# Supplementary material for: Evaluating the oestrogenic activities of aqueous root extract of Asparagus africanus Lam in female Sprague-Dawley rats and its phytochemical screening using Gas Chromatography-Mass Spectrometry (GC/MS)
Source: PubMed Central journal article supplement (PMC6644626; doi:10.7717/peerj.7254), 2019-07-19
Supplement: peerj-07-7254-s002.pdf [file peerj-07-7254-s002.pdf]

The mass spectrum of all 9 compounds are presented as supplementary materials and labelled from figure S1 to figure S9.

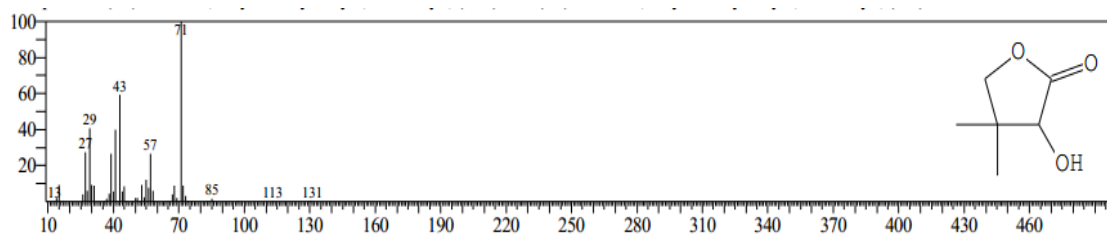

**Figure S1:** Mass spectrum and chemical structure of (3H)-Furanose, dihydro-3-hydroxy-4,4-dimethyl

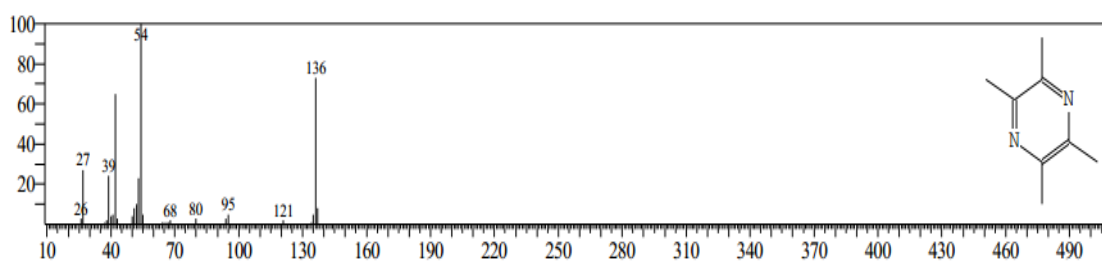

**Figure S2:** Mass spectrum and chemical structure of Pyrazinetetramethyl

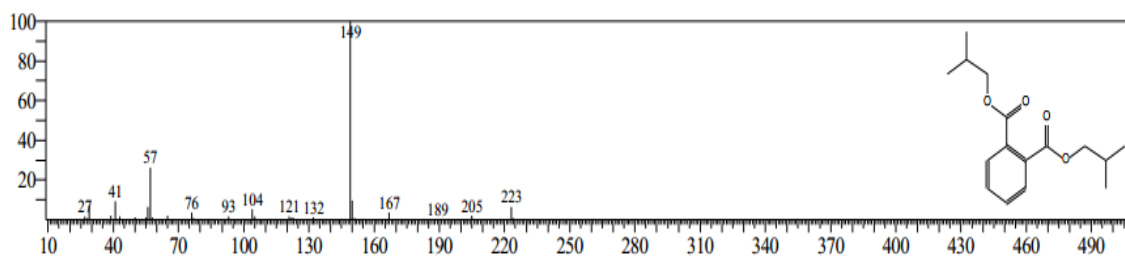

**Figure S3:** Mass spectrum and chemical structure of 1,2-Benzenedicarboxylic acid

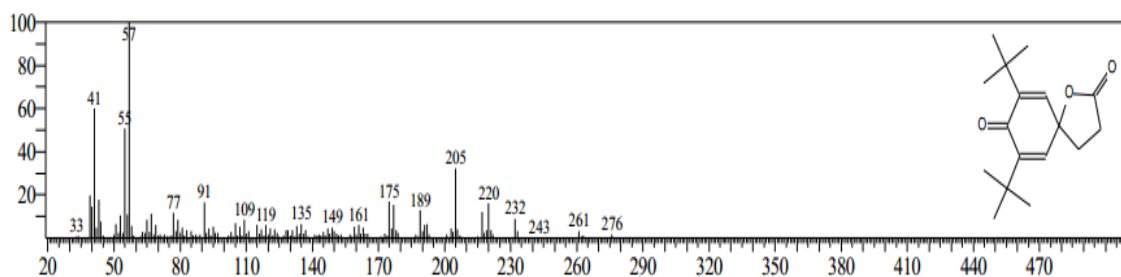

**Figure S4:** Mass spectrum and chemical structure of 7,9-Die-tert-butyl-1-oxospiro (4,5) deca-6,9-diene-2,8-dione

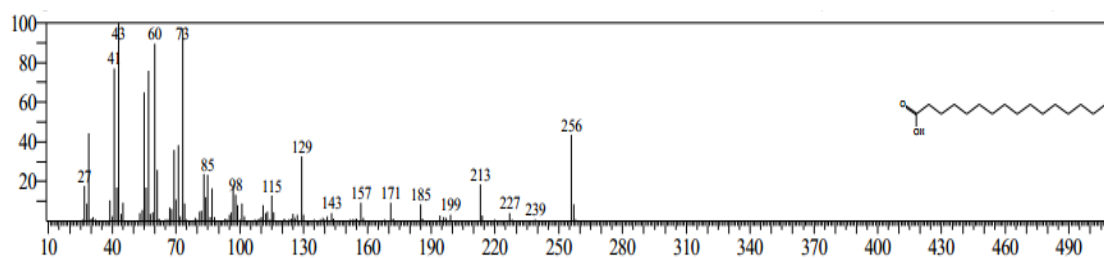

**Figure S5:** Mass spectrum and chemical structure of n-Hexadecanoic acid

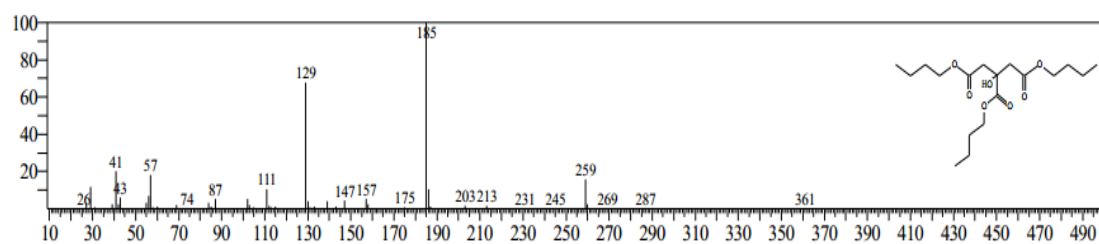

**Figure S6:** Mass spectrum and chemical structure of 1-Butyl citrate

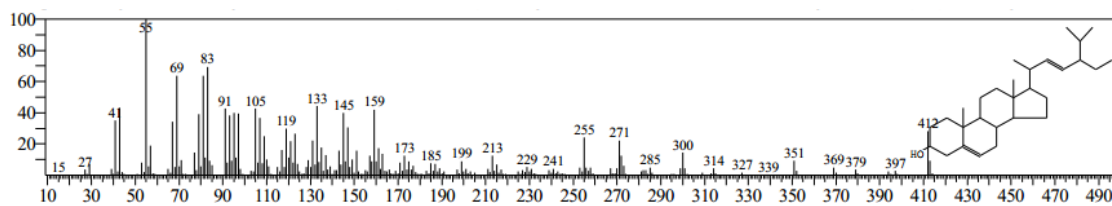

**Figure S7:** Mass spectrum and chemical structure of Stigmasterol

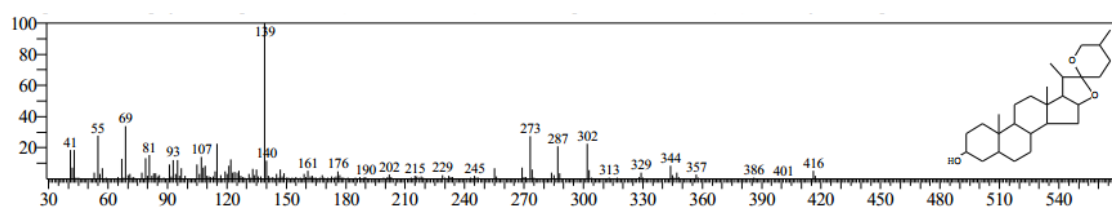

**Figure S8:** Mass spectrum and chemical structure of Sarsasapogenin

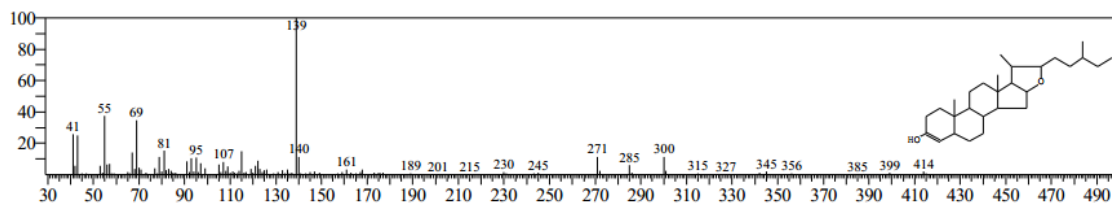

**Figure S9:** Mass spectrum and chemical structure of 3-Dehydro-des-N-26-methyl-dihydro-pseudotomatidine
