# Supplementary material for: Evaluating the oestrogenic activities of aqueous root extract of Asparagus africanus Lam in female Sprague-Dawley rats and its phytochemical screening using Gas Chromatography-Mass Spectrometry (GC/MS)
Source: PeerJ. 2019 Jul 19;7:e7254. doi: 10.7717/peerj.7254 (PMC6644626; doi:10.7717/peerj.7254)
Supplement: Supplemental Information 1 [file peerj-07-7254-s001.xlsx]

## Sheet: BW WO
		WEEK 1			Initial Wt	Control 5.0ml/kgBW(DW)	1mg/kgBW(EE)	50mg/kgBW	200mg/kgBW	800mg/kgBW		Final	Control 5.0ml/kgBW(DW)	1mg/kgBW(EE)	50mg/kgBW	200mg/kgBW	800mg/kgBW		diff Control	diff EE	diff 50	diff 200	diff800
						203.23	185.12	186.45	215.4	174.47			249.43	220.23	256.59	249.32	228.09		46.2	35.11	70.14	33.92	53.62
						199.11	194.02	177.1	204.26	177.57			244.35	208.21	242.24	245.01	231.57		45.24	14.19	65.14	40.75	54
						186.16	175.91	172.11	204.74	176.51			247.23	214.92	237.2	235.55	233.28		61.07	39.01	65.09	30.81	56.77
						188.24	197.01	183.22	194.4	174.28			222.7	229.43	268.32	236.45	233.51		34.46	32.42	85.1	42.05	59.23
						176.33	197	167.5	195.16	174.54			280.74	190.25	230.11	249.51	237.1		104.41	-6.75	62.61	54.35	62.56
						199.1	185.76	172.85	182.3	182.55			249.73	216.1	231.54	223.32	242.13		50.63	30.34	58.69	41.02	59.58
					Mean	192.028	189.137	176.538	199.377	176.653			249.03	213.19	244.333	239.86	234.28	mean	57.0017	24.0533	67.795	40.4833	57.6267
					Std	9.31721	7.63925	6.55879	10.3563	2.90107		Std	16.9538	12.0817	13.8252	9.24583	4.41263	SD	24.7703	17.3298	9.26405	8.14554	3.48321
					Mean±SEM							Mean±SEM
					Group	initial	final	diff	SD	SEM	PV
					Control 5.0ml/kgBW	192.028	249.03	57.0017	24.7703	10.1124	-
					1mg/kgBW(EE)	189.137	213.19	24.0533	17.3298	7.07485	0.0054602
					50mg/kgBW	176.538	244.333	25.79	9.26405	3.78203	0.709483
					200mg/kgBW	199.377	239.86	40.4833	8.14554	3.3254	0.319352
					800mg/kgBW	176.653	234.28	57.6267	3.48321	1.42202	0.999993
					Descriptives
					Weight gain
						N	Mean	Std. Deviation	Std. Error	95% Confidence Interval for Mean		Minimum	Maximum
										Lower Bound	Upper Bound
					Corn oil (5mg/KgBW)	6	57.0017	24.7703	10.1124	31.0068	82.9965	34.46	104.41
					Estradiol (1mg/KgBW)	6	24.0533	17.3298	7.07485	5.86685	42.2398	-6.75	39.01
					50mg/KgBW Extract AA	6	67.795	9.26405	3.78203	58.073	77.517	58.69	85.1
					200mg/KgBW Extract AA	6	40.4833	8.14554	3.3254	31.9351	49.0315	30.81	54.35
					800mg/KgBW Extract AA	6	57.6267	3.48321	1.42202	53.9713	61.2821	53.62	62.56
					Total	30	49.392	20.7662	3.79136	41.6378	57.1462	-6.75	104.41
					Multiple Comparisons
					Dependent Variable:	Weight gain
					(I) Treatment			Mean Difference (I-J)	Std. Error	Sig.	95% Confidence Interval
											Lower Bound	Upper Bound
					Tukey HSD	Corn oil (5mg/KgBW)	Estradiol (1mg/KgBW)	32.94833*	8.47818	0.0054602	8.049	57.8477
							50mg/KgBW Extract AA	-10.7933	8.47818	0.709483	-35.6927	14.106
							200mg/KgBW Extract AA	16.5183	8.47818	0.319352	-8.381	41.4177
							800mg/KgBW Extract AA	-0.625	8.47818	0.999993	-25.5243	24.2743
						Estradiol (1mg/KgBW)	Corn oil (5mg/KgBW)	-32.94833*	8.47818	0.0054602	-57.8477	-8.049
							50mg/KgBW Extract AA	-43.74167*	8.47818	0.000221467	-68.641	-18.8423
							200mg/KgBW Extract AA	-16.43	8.47818	0.324411	-41.3293	8.46934
							800mg/KgBW Extract AA	-33.57333*	8.47818	0.00455418	-58.4727	-8.674
						50mg/KgBW Extract AA	Corn oil (5mg/KgBW)	10.7933	8.47818	0.709483	-14.106	35.6927
							Estradiol (1mg/KgBW)	43.74167*	8.47818	0.000221467	18.8423	68.641
							200mg/KgBW Extract AA	27.31167*	8.47818	0.0265375	2.41233	52.211
							800mg/KgBW Extract AA	10.1683	8.47818	0.751689	-14.731	35.0677
						200mg/KgBW Extract AA	Corn oil (5mg/KgBW)	-16.5183	8.47818	0.319352	-41.4177	8.381
							Estradiol (1mg/KgBW)	16.43	8.47818	0.324411	-8.46934	41.3293
							50mg/KgBW Extract AA	-27.31167*	8.47818	0.0265375	-52.211	-2.41233
							800mg/KgBW Extract AA	-17.1433	8.47818	0.284964	-42.0427	7.756
						800mg/KgBW Extract AA	Corn oil (5mg/KgBW)	0.625	8.47818	0.999993	-24.2743	25.5243
							Estradiol (1mg/KgBW)	33.57333*	8.47818	0.00455418	8.674	58.4727
							50mg/KgBW Extract AA	-10.1683	8.47818	0.751689	-35.0677	14.731
							200mg/KgBW Extract AA	17.1433	8.47818	0.284964	-7.756	42.0427
					Bonferroni	Corn oil (5mg/KgBW)	Estradiol (1mg/KgBW)	32.94833*	8.47818	0.0066317	6.85079	59.0459
							50mg/KgBW Extract AA	-10.7933	8.47818	1	-36.8909	15.3042
							200mg/KgBW Extract AA	16.5183	8.47818	0.626846	-9.57921	42.6159
							800mg/KgBW Extract AA	-0.625	8.47818	1	-26.7225	25.4725
						Estradiol (1mg/KgBW)	Corn oil (5mg/KgBW)	-32.94833*	8.47818	0.0066317	-59.0459	-6.85079
							50mg/KgBW Extract AA	-43.74167*	8.47818	0.000246924	-69.8392	-17.6441
							200mg/KgBW Extract AA	-16.43	8.47818	0.640068	-42.5275	9.66754
							800mg/KgBW Extract AA	-33.57333*	8.47818	0.00549056	-59.6709	-7.47579
						50mg/KgBW Extract AA	Corn oil (5mg/KgBW)	10.7933	8.47818	1	-15.3042	36.8909
							Estradiol (1mg/KgBW)	43.74167*	8.47818	0.000246924	17.6441	69.8392
							200mg/KgBW Extract AA	27.31167*	8.47818	0.0352589	1.21412	53.4092
							800mg/KgBW Extract AA	10.1683	8.47818	1	-15.9292	36.2659
						200mg/KgBW Extract AA	Corn oil (5mg/KgBW)	-16.5183	8.47818	0.626846	-42.6159	9.57921
							Estradiol (1mg/KgBW)	16.43	8.47818	0.640068	-9.66754	42.5275
							50mg/KgBW Extract AA	-27.31167*	8.47818	0.0352589	-53.4092	-1.21412
							800mg/KgBW Extract AA	-17.1433	8.47818	0.539956	-43.2409	8.95421
						800mg/KgBW Extract AA	Corn oil (5mg/KgBW)	0.625	8.47818	1	-25.4725	26.7225
							Estradiol (1mg/KgBW)	33.57333*	8.47818	0.00549056	7.47579	59.6709
							50mg/KgBW Extract AA	-10.1683	8.47818	1	-36.2659	15.9292
							200mg/KgBW Extract AA	17.1433	8.47818	0.539956	-8.95421	43.2409
					*. The mean difference is significant at the 0.05 level.

## Sheet: BW WA
				WEEK 1		group	Control 5.0ml/kgBW	1mg/kgBW(EE)	50mg/kgBW	200mg/kgBW	800mg/kgBW		final	Control 5.0ml/kgBW	1mg/kgBW(EE)	50mg/kgBW	200mg/kgBW	800mg/kgBW		diff Control	diff EE	diff 50	diff 200	diff800
							225.45	186.33	179.44	206.58	184.45			276.84	214.54	191.59	222.43	191.8		51.39	28.21	12.15	15.85	7.35
							202.27	216.34	204.54	189.01	185.47			249.74	244.63	235.48	215.54	178.79		47.47	28.29	30.94	26.53	-6.68
							204.44	205.48	182.92	183.32	203.46			256.28	245.41	211.54	174.93	230.12		51.84	39.93	28.62	-8.39	26.66
							254.22	199.56	186.87	196.46	199.28			298.42	216.82	215.49	211.21	224.41		44.2	17.26	28.62	14.75	25.13
							239.27	195.25	205.21	203.53	220.05			312.49	219.87	216.22	226.49	217.4		73.22	24.62	11.01	22.96	-2.65
							246.24	213.34	208.2	217.94	188.47			302.82	229.44	219.53	248.92	193.1		56.58	16.1	11.33	30.98	4.63
				Initial Mean Weight			228.648	202.717	194.53	199.473	196.863	Final Mean weight		282.765	228.452	214.975	216.587	205.937	mean	54.1167	25.735	20.445	17.1133	9.07333
						Std	19.8674	10.3306	11.7069	11.4562	12.5255		Std	23.6575	12.6014	12.9208	22.147	18.9696	SD	10.2581	8.71841	9.84597	13.9481	13.9673
						Mean±SEM							Mean±SEM						SEM
	10.2581
				Group	initial	final	diff	SD	SEM	PV
				Control 5.0ml/kgBW	228.648	282.765	54.1167	10.2581	4.18785
				1mg/kgBW(EE)	202.717	228.452	25.735	8.71841	3.55928	0.00219352
				50mg/kgBW	194.53	214.975	20.445	9.84597	4.0196	0.000295025
				200mg/kgBW	199.473	216.587	17.1133	13.9481	5.69427	8.32206e-05
				800mg/kgBW	196.863	205.937	9.07333	13.9673	5.70212	4.19633e-06
	Descriptives
	Weight gain
		N	Mean	Std. Deviation	Std. Error	95% Confidence Interval for Mean		Minimum	Maximum
						Lower Bound	Upper Bound
	Corn oil (5mg/KgBW)	6	54.1167	10.2581	4.18785	43.3515	64.8819	44.2	73.22
	Estradiol (1mg/KgBW)	6	25.735	8.71841	3.55928	16.5856	34.8844	16.1	39.93
	50mg/KgBW Extract AA	6	20.445	9.84597	4.0196	10.1123	30.7777	11.01	30.94
	200mg/KgBW Extract AA	6	17.1133	13.9481	5.69427	2.47573	31.7509	-8.39	30.98
	800mg/KgBW Extract AA	6	9.07333	13.9673	5.70212	-5.58443	23.7311	-6.68	26.66
	Total	30	25.2967	18.9791	3.4651	18.2097	32.3836	-8.39	73.22
	Multiple Comparisons
	Dependent Variable:	Weight gain
	(I) Treatment			Mean Difference (I-J)	Std. Error	Sig.	95% Confidence Interval
							Lower Bound	Upper Bound
	Tukey HSD	Corn oil (5mg/KgBW)	Estradiol (1mg/KgBW)	28.38167*	6.67241	0.00219352	8.78566	47.9777
			50mg/KgBW Extract AA	33.67167*	6.67241	0.000295025	14.0757	53.2677
			200mg/KgBW Extract AA	37.00333*	6.67241	8.32206e-05	17.4073	56.5993
			800mg/KgBW Extract AA	45.04333*	6.67241	4.19633e-06	25.4473	64.6393
		Estradiol (1mg/KgBW)	Corn oil (5mg/KgBW)	-28.38167*	6.67241	0.00219352	-47.9777	-8.78566
			50mg/KgBW Extract AA	5.29	6.67241	0.930294	-14.306	24.886
			200mg/KgBW Extract AA	8.62167	6.67241	0.698273	-10.9743	28.2177
			800mg/KgBW Extract AA	16.6617	6.67241	0.1234	-2.93434	36.2577
		50mg/KgBW Extract AA	Corn oil (5mg/KgBW)	-33.67167*	6.67241	0.000295025	-53.2677	-14.0757
			Estradiol (1mg/KgBW)	-5.29	6.67241	0.930294	-24.886	14.306
			200mg/KgBW Extract AA	3.33167	6.67241	0.986682	-16.2643	22.9277
			800mg/KgBW Extract AA	11.3717	6.67241	0.449492	-8.22434	30.9677
		200mg/KgBW Extract AA	Corn oil (5mg/KgBW)	-37.00333*	6.67241	8.32206e-05	-56.5993	-17.4073
			Estradiol (1mg/KgBW)	-8.62167	6.67241	0.698273	-28.2177	10.9743
			50mg/KgBW Extract AA	-3.33167	6.67241	0.986682	-22.9277	16.2643
			800mg/KgBW Extract AA	8.04	6.67241	0.74855	-11.556	27.636
		800mg/KgBW Extract AA	Corn oil (5mg/KgBW)	-45.04333*	6.67241	4.19633e-06	-64.6393	-25.4473
			Estradiol (1mg/KgBW)	-16.6617	6.67241	0.1234	-36.2577	2.93434
			50mg/KgBW Extract AA	-11.3717	6.67241	0.449492	-30.9677	8.22434
			200mg/KgBW Extract AA	-8.04	6.67241	0.74855	-27.636	11.556
	Bonferroni	Corn oil (5mg/KgBW)	Estradiol (1mg/KgBW)	28.38167*	6.67241	0.00257742	7.84266	48.9207
			50mg/KgBW Extract AA	33.67167*	6.67241	0.000330559	13.1327	54.2107
			200mg/KgBW Extract AA	37.00333*	6.67241	9.14618e-05	16.4643	57.5423
			800mg/KgBW Extract AA	45.04333*	6.67241	4.48245e-06	24.5043	65.5823
		Estradiol (1mg/KgBW)	Corn oil (5mg/KgBW)	-28.38167*	6.67241	0.00257742	-48.9207	-7.84266
			50mg/KgBW Extract AA	5.29	6.67241	1	-15.249	25.829
			200mg/KgBW Extract AA	8.62167	6.67241	1	-11.9173	29.1607
			800mg/KgBW Extract AA	16.6617	6.67241	0.194695	-3.87734	37.2007
		50mg/KgBW Extract AA	Corn oil (5mg/KgBW)	-33.67167*	6.67241	0.000330559	-54.2107	-13.1327
			Estradiol (1mg/KgBW)	-5.29	6.67241	1	-25.829	15.249
			200mg/KgBW Extract AA	3.33167	6.67241	1	-17.2073	23.8707
			800mg/KgBW Extract AA	11.3717	6.67241	1	-9.16734	31.9107
		200mg/KgBW Extract AA	Corn oil (5mg/KgBW)	-37.00333*	6.67241	9.14618e-05	-57.5423	-16.4643
			Estradiol (1mg/KgBW)	-8.62167	6.67241	1	-29.1607	11.9173
			50mg/KgBW Extract AA	-3.33167	6.67241	1	-23.8707	17.2073
			800mg/KgBW Extract AA	8.04	6.67241	1	-12.499	28.579
		800mg/KgBW Extract AA	Corn oil (5mg/KgBW)	-45.04333*	6.67241	4.48245e-06	-65.5823	-24.5043
			Estradiol (1mg/KgBW)	-16.6617	6.67241	0.194695	-37.2007	3.87734
			50mg/KgBW Extract AA	-11.3717	6.67241	1	-31.9107	9.16734
			200mg/KgBW Extract AA	-8.04	6.67241	1	-28.579	12.499
	*. The mean difference is significant at the 0.05 level.

## Sheet: BW Combined
				WO						WA
			Dose	Weight WO	SD	SEM	PV			Weight WA	SD	SEM	PV
			Control 5.0ml/kgBW	57.0017	24.7703	10.1124	-			54.1167	10.2581	4.18785
			1mg/kgBW(EE)	24.0533	17.3298	7.07485	0.0054602			25.735	8.71841	3.55928	0.0021
			50mg/kgBW	25.795	9.26405	3.78203	0.709483			20.445	9.84597	4.0196	0.0002
			200mg/kgBW	40.4833	8.14554	3.3254	0.319352			17.1133	13.9481	5.69427	8.32206e-05
			800mg/kgBW	57.6267	3.48321	1.42202	0.999993			9.07333	13.9673	5.70212	4.19633e-06

## Sheet: ER WO
		Dose	Estrogen(pmol/L)									Control	EE	50 AA	200 AA	800 AA
		Control Corn Oil 5.0 ml/kgBW(-ve)	51									51	58	82	82	93
			44									44	56	68	92	103
			81									81	73	93	98	85
			63									63	62	102	105	126
			50									50	59	125	124	89
			56									56	54	94	137	145
		MEAN	57.5								mean	57.5	60.3333	94	106.333	106.833
		SEM	12.0104								SD	13.1567	6.77249	19.2146	20.5977	23.769
					Dose	Estrogen	SD	SEM	PV
		1mg/kgBW(+ve) 17α-ethinylestradiol	58		Control 5.0ml/kgBW	57.5	13.1567	5.37122
			56		1mg/kgBW(EE)	60.3333	6.77249	2.76486
			73		50mg/kgBW	94	19.2146	7.84432	0.0120523
			62		200mg/kgBW	106.333	20.5977	8.40899	0.000607516
			59		800mg/kgBW	106.833	23.769	9.70366	0.000536791
			54
		MEAN	60.3333
		SEM	6.18241
		M+SEM
		50mg/kgBW	82
			68
			93
			102
			125
			94
		MEAN	94
		SEM	17.5404
		M+SEM
		200mg/kgBW	82
			92				Descriptives
			98				Estrogen
			105					N	Mean	Std. Deviation	Std. Error	95% Confidence Interval for Mean		Minimum	Maximum
			124									Lower Bound	Upper Bound
			137				Corn oil (5mg/KgBW)	6	57.5	13.1567	5.37122	43.6928	71.3072	44	81
		MEAN	106.333				Estradiol (1mg/KgBW)	6	60.3333	6.77249	2.76486	53.226	67.4406	54	73
		SEM	18.8031				50mg/KgBW Extract AA	6	94	19.2146	7.84432	73.8355	114.164	68	125
		M+SEM					200mg/KgBW Extract AA	6	106.333	20.5977	8.40899	84.7173	127.949	82	137
							800mg/KgBW Extract AA	6	106.833	23.769	9.70366	81.8893	131.777	85	145
		800mg/kgBW	93				Total	30	85	27.6381	5.046	74.6798	95.3202	44	145
			103
			85
			126
			89
			145				Multiple Comparisons
		MEAN	106.833				Dependent Variable:	Estrogen
		SEM	21.6981				(I) Treatment			Mean Difference (I-J)	Std. Error	Sig.	95% Confidence Interval
													Lower Bound	Upper Bound
							Tukey HSD	Corn oil (5mg/KgBW)	Estradiol (1mg/KgBW)	-2.83333	10.2548	0.998632	-32.9502	27.2836
									50mg/KgBW Extract AA	-36.50000*	10.2548	0.0120523	-66.6169	-6.3831
									200mg/KgBW Extract AA	-48.83333*	10.2548	0.000607516	-78.9502	-18.7164
									800mg/KgBW Extract AA	-49.33333*	10.2548	0.000536791	-79.4502	-19.2164
								Estradiol (1mg/KgBW)	Corn oil (5mg/KgBW)	2.83333	10.2548	0.998632	-27.2836	32.9502
									50mg/KgBW Extract AA	-33.66667*	10.2548	0.0230416	-63.7836	-3.54977
									200mg/KgBW Extract AA	-46.00000*	10.2548	0.00122305	-76.1169	-15.8831
									800mg/KgBW Extract AA	-46.50000*	10.2548	0.00108127	-76.6169	-16.3831
								50mg/KgBW Extract AA	Corn oil (5mg/KgBW)	36.50000*	10.2548	0.0120523	6.3831	66.6169
									Estradiol (1mg/KgBW)	33.66667*	10.2548	0.0230416	3.54977	63.7836
									200mg/KgBW Extract AA	-12.3333	10.2548	0.749821	-42.4502	17.7836
									800mg/KgBW Extract AA	-12.8333	10.2548	0.72206	-42.9502	17.2836
								200mg/KgBW Extract AA	Corn oil (5mg/KgBW)	48.83333*	10.2548	0.000607516	18.7164	78.9502
									Estradiol (1mg/KgBW)	46.00000*	10.2548	0.00122305	15.8831	76.1169
									50mg/KgBW Extract AA	12.3333	10.2548	0.749821	-17.7836	42.4502
									800mg/KgBW Extract AA	-0.5	10.2548	0.999999	-30.6169	29.6169
								800mg/KgBW Extract AA	Corn oil (5mg/KgBW)	49.33333*	10.2548	0.000536791	19.2164	79.4502
									Estradiol (1mg/KgBW)	46.50000*	10.2548	0.00108127	16.3831	76.6169
									50mg/KgBW Extract AA	12.8333	10.2548	0.72206	-17.2836	42.9502
									200mg/KgBW Extract AA	0.5	10.2548	0.999999	-29.6169	30.6169
							Bonferroni	Corn oil (5mg/KgBW)	Estradiol (1mg/KgBW)	-2.83333	10.2548	1	-34.3995	28.7328
									50mg/KgBW Extract AA	-36.50000*	10.2548	0.01521	-68.0662	-4.93382
									200mg/KgBW Extract AA	-48.83333*	10.2548	0.000690388	-80.3995	-17.2672
									800mg/KgBW Extract AA	-49.33333*	10.2548	0.000608418	-80.8995	-17.7672
								Estradiol (1mg/KgBW)	Corn oil (5mg/KgBW)	2.83333	10.2548	1	-28.7328	34.3995
									50mg/KgBW Extract AA	-33.66667*	10.2548	0.0302958	-65.2328	-2.10049
									200mg/KgBW Extract AA	-46.00000*	10.2548	0.00141324	-77.5662	-14.4338
									800mg/KgBW Extract AA	-46.50000*	10.2548	0.00124545	-78.0662	-14.9338
								50mg/KgBW Extract AA	Corn oil (5mg/KgBW)	36.50000*	10.2548	0.01521	4.93382	68.0662
									Estradiol (1mg/KgBW)	33.66667*	10.2548	0.0302958	2.10049	65.2328
									200mg/KgBW Extract AA	-12.3333	10.2548	1	-43.8995	19.2328
									800mg/KgBW Extract AA	-12.8333	10.2548	1	-44.3995	18.7328
								200mg/KgBW Extract AA	Corn oil (5mg/KgBW)	48.83333*	10.2548	0.000690388	17.2672	80.3995
									Estradiol (1mg/KgBW)	46.00000*	10.2548	0.00141324	14.4338	77.5662
									50mg/KgBW Extract AA	12.3333	10.2548	1	-19.2328	43.8995
									800mg/KgBW Extract AA	-0.5	10.2548	1	-32.0662	31.0662
								800mg/KgBW Extract AA	Corn oil (5mg/KgBW)	49.33333*	10.2548	0.000608418	17.7672	80.8995
									Estradiol (1mg/KgBW)	46.50000*	10.2548	0.00124545	14.9338	78.0662
									50mg/KgBW Extract AA	12.8333	10.2548	1	-18.7328	44.3995
									200mg/KgBW Extract AA	0.5	10.2548	1	-31.0662	32.0662
							*. The mean difference is significant at the 0.05 level.

## Sheet: ER WA
		Dose	Estrogen (pmol/L)
		Control Corn Oil 5.0 ml/kgBW(-ve)	57
			56
			55				Control	EE	50 AA	200 AA	800 AA		Dose	Estrogen	SD	SEM	PV
			54				57	78	77	69	68		Control 5.0ml/kgBW	54.6667	4.71876	1.92642
			60				56	77	78	101	81		1mg/kgBW(EE)	71.6667	5.16398	2.10819	0.0747415
			46				55	71	87	117	80		50mg/kgBW	79.6667	10.3473	4.22427	0.0037341
		MEAN	54.6667				54	70	88	71	77		200mg/kgBW	84.8333	19.7628	8.06811	0.000455763
		SEM	4.30762				60	70	87	71	83		800mg/kgBW	77.8	5.26878	2.15097	0.00783031
							46	64	61	80	77.8
						mean	54.6667	71.6667	79.6667	84.8333	77.8
		1mg/kgBW(+ve) 17α-ethinylestradiol	78			SD	4.71876	5.16398	10.3473	19.7628	5.26878
			77
			71
			70
			70
			64
		MEAN	71.6667
		SEM	4.71405
		M+SEM
		50mg/kgBW	77
			78
			87
			88
			87
			61
		MEAN	79.6667
		SEM	9.44575
		M+SEM
		200mg/kgBW	69				Descriptives
			101				Estrogen
			117					N	Mean	Std. Deviation	Std. Error	95% Confidence Interval for Mean		Minimum	Maximum
			71									Lower Bound	Upper Bound
			71				Corn oil (5mg/KgBW)	6	54.6667	4.71876	1.92642	49.7146	59.6187	46	60
			80				Estradiol (1mg/KgBW)	6	71.6667	5.16398	2.10819	66.2474	77.0859	64	78
		MEAN	84.8333				50mg/KgBW Extract AA	6	79.6667	10.3473	4.22427	68.8078	90.5255	61	88
		SEM	18.0408				200mg/KgBW Extract AA	6	84.8333	19.7628	8.06811	64.0936	105.573	69	117
		M+SEM					800mg/KgBW Extract AA	6	77.8	5.26878	2.15097	72.2708	83.3292	68	83
							Total	30	73.7267	14.5368	2.65404	68.2986	79.1548	46	117
		800mg/kgBW	68
			81
			80
			77				Multiple Comparisons
			83				Dependent Variable:	Estrogen
			77.8				(I) Treatment			Mean Difference (I-J)	Std. Error	Sig.	95% Confidence Interval
		MEAN	77.8										Lower Bound	Upper Bound
		SEM	5.26878				Tukey HSD	Corn oil (5mg/KgBW)	Estradiol (1mg/KgBW)	-17	6.18777	0.0747415	-35.1727	1.17267
									50mg/KgBW Extract AA	-25.00000*	6.18777	0.0037341	-43.1727	-6.82733
									200mg/KgBW Extract AA	-30.16667*	6.18777	0.000455763	-48.3393	-11.994
									800mg/KgBW Extract AA	-23.13333*	6.18777	0.00783031	-41.306	-4.96066
								Estradiol (1mg/KgBW)	Corn oil (5mg/KgBW)	17	6.18777	0.0747415	-1.17267	35.1727
									50mg/KgBW Extract AA	-8	6.18777	0.697837	-26.1727	10.1727
									200mg/KgBW Extract AA	-13.1667	6.18777	0.240042	-31.3393	5.00601
									800mg/KgBW Extract AA	-6.13333	6.18777	0.856768	-24.306	12.0393
								50mg/KgBW Extract AA	Corn oil (5mg/KgBW)	25.00000*	6.18777	0.0037341	6.82733	43.1727
									Estradiol (1mg/KgBW)	8	6.18777	0.697837	-10.1727	26.1727
									200mg/KgBW Extract AA	-5.16667	6.18777	0.917121	-23.3393	13.006
									800mg/KgBW Extract AA	1.86667	6.18777	0.99807	-16.306	20.0393
								200mg/KgBW Extract AA	Corn oil (5mg/KgBW)	30.16667*	6.18777	0.000455763	11.994	48.3393
									Estradiol (1mg/KgBW)	13.1667	6.18777	0.240042	-5.00601	31.3393
									50mg/KgBW Extract AA	5.16667	6.18777	0.917121	-13.006	23.3393
									800mg/KgBW Extract AA	7.03333	6.18777	0.785823	-11.1393	25.206
								800mg/KgBW Extract AA	Corn oil (5mg/KgBW)	23.13333*	6.18777	0.00783031	4.96066	41.306
									Estradiol (1mg/KgBW)	6.13333	6.18777	0.856768	-12.0393	24.306
									50mg/KgBW Extract AA	-1.86667	6.18777	0.99807	-20.0393	16.306
									200mg/KgBW Extract AA	-7.03333	6.18777	0.785823	-25.206	11.1393
							Bonferroni	Corn oil (5mg/KgBW)	Estradiol (1mg/KgBW)	-17	6.18777	0.109816	-36.0472	2.04718
									50mg/KgBW Extract AA	-25.00000*	6.18777	0.00446781	-44.0472	-5.95282
									200mg/KgBW Extract AA	-30.16667*	6.18777	0.000514857	-49.2138	-11.1195
									800mg/KgBW Extract AA	-23.13333*	6.18777	0.00966485	-42.1805	-4.08616
								Estradiol (1mg/KgBW)	Corn oil (5mg/KgBW)	17	6.18777	0.109816	-2.04718	36.0472
									50mg/KgBW Extract AA	-8	6.18777	1	-27.0472	11.0472
									200mg/KgBW Extract AA	-13.1667	6.18777	0.433897	-32.2138	5.88051
									800mg/KgBW Extract AA	-6.13333	6.18777	1	-25.1805	12.9138
								50mg/KgBW Extract AA	Corn oil (5mg/KgBW)	25.00000*	6.18777	0.00446781	5.95282	44.0472
									Estradiol (1mg/KgBW)	8	6.18777	1	-11.0472	27.0472
									200mg/KgBW Extract AA	-5.16667	6.18777	1	-24.2138	13.8805
									800mg/KgBW Extract AA	1.86667	6.18777	1	-17.1805	20.9138
								200mg/KgBW Extract AA	Corn oil (5mg/KgBW)	30.16667*	6.18777	0.000514857	11.1195	49.2138
									Estradiol (1mg/KgBW)	13.1667	6.18777	0.433897	-5.88051	32.2138
									50mg/KgBW Extract AA	5.16667	6.18777	1	-13.8805	24.2138
									800mg/KgBW Extract AA	7.03333	6.18777	1	-12.0138	26.0805
								800mg/KgBW Extract AA	Corn oil (5mg/KgBW)	23.13333*	6.18777	0.00966485	4.08616	42.1805
									Estradiol (1mg/KgBW)	6.13333	6.18777	1	-12.9138	25.1805
									50mg/KgBW Extract AA	-1.86667	6.18777	1	-20.9138	17.1805
									200mg/KgBW Extract AA	-7.03333	6.18777	1	-26.0805	12.0138
							*. The mean difference is significant at the 0.05 level.

## Sheet: ER combined
		WO							WA
		Dose	Oestrogen WO	SD	SEM	PV			Dose	Oestrogen WA	SD	SEM	PV
		Control 5.0ml/kgBW	57.5	13.1567	5.37122				Control 5.0ml/kgBW	54.6667	4.71876	1.92642
	60	1mg/kgBW(EE)	80.3333	6.77249	2.76486	0.998632			1mg/kgBW(EE)	71.6667	5.16398	2.10819	0.0747415
		50mg/kgBW	94	19.2146	7.84432	0.0120523			50mg/kgBW	79.6667	10.3473	4.22427	0.0037341
		200mg/kgBW	106.333	20.5977	8.40899	0.000607516			200mg/kgBW	84.8333	19.7628	8.06811	0.000455763
		800mg/kgBW	106.833	23.769	9.70366	0.000536791			800mg/kgBW	77.8	5.26878	2.15097	0.00783031

## Sheet: Pgr WO
		Dose	Progesterone (nmol/L)				Control	EE	50 AA	200 AA	800 AA		Dose	Progesterone (nmol/L)	SD	SEM	PV
		Control Corn Oil 5.0 ml/kgBW(-ve)	11.6				11.6	4.3	7.3		4		Control 5.0ml/kgBW	13.75	4.93184	2.01341
			12.6				12.6	2.7	6.9	9.6	5.2		1mg/kgBW(EE)	3.75	1.16576	0.47592	2.42116e-05
			15.1				15.1	4.9	2.7	4.8	2.6		50mg/kgBW	5.05	2.24299	0.915696	0.000164858
			22.9				22.9	2.1	2.2	4.3	3.4		200mg/kgBW	5.525	2.77774	1.38887	0.00123833
			11.6				11.6	4.9	6.7	3.4	3.1		800mg/kgBW	3.68333	0.895358	0.365529	2.19767e-05
			8.7				8.7	3.6	4.5		3.8
		MEAN	13.75			mean	13.75	3.75	5.05	5.525	3.68333
		SEM	4.50213			SD	4.50213	1.06419	2.04756	2.77774	0.817347
		1mg/kgBW(+ve) 17α-ethinylestradiol	4.3
			2.7
			4.9
			2.1				Descriptives
			4.9				Progesterone
			3.6					N	Mean	Std. Deviation	Std. Error	95% Confidence Interval for Mean		Minimum	Maximum
		MEAN	3.75									Lower Bound	Upper Bound
		SEM	1.06419				Corn oil (5mg/KgBW)	6	13.75	4.93184	2.01341	8.57436	18.9256	8.7	22.9
		M+SEM					Estradiol (1mg/KgBW)	6	3.75	1.16576	0.47592	2.52661	4.97339	2.1	4.9
							50mg/KgBW Extract AA	6	5.05	2.24299	0.915696	2.69613	7.40387	2.2	7.3
		50mg/kgBW	7.3				200mg/KgBW Extract AA	4	5.525	2.77774	1.38887	1.105	9.945	3.4	9.6
			6.9				800mg/KgBW Extract AA	6	3.68333	0.895358	0.365529	2.74371	4.62295	2.6	5.2
			2.7				Total	28	6.41071	4.73469	0.894772	4.57479	8.24664	2.1	22.9
			2.2
			6.7
			4.5
		MEAN	5.05			Multiple Comparisons
		SEM	2.04756			Dependent Variable:	Progesterone
		M+SEM				(I) Treatment			Mean Difference (I-J)	Std. Error	Sig.	95% Confidence Interval
												Lower Bound	Upper Bound
		200mg/kgBW	23			Tukey HSD	Corn oil (5mg/KgBW)	Estradiol (1mg/KgBW)	10.00000*	1.61838	2.42116e-05	5.21604	14.784
			9.6					50mg/KgBW Extract AA	8.70000*	1.61838	0.000164858	3.91604	13.484
			4.8					200mg/KgBW Extract AA	8.22500*	1.8094	0.00123833	2.87637	13.5736
			4.3					800mg/KgBW Extract AA	10.06667*	1.61838	2.19767e-05	5.28271	14.8506
			3.4				Estradiol (1mg/KgBW)	Corn oil (5mg/KgBW)	-10.00000*	1.61838	2.42116e-05	-14.784	-5.21604
			52.8					50mg/KgBW Extract AA	-1.3	1.61838	0.926942	-6.08396	3.48396
		MEAN	16.3167					200mg/KgBW Extract AA	-1.775	1.8094	0.861033	-7.12363	3.57363
		SEM	17.629					800mg/KgBW Extract AA	0.0666667	1.61838	0.999999	-4.71729	4.85063
		M+SEM					50mg/KgBW Extract AA	Corn oil (5mg/KgBW)	-8.70000*	1.61838	0.000164858	-13.484	-3.91604
								Estradiol (1mg/KgBW)	1.3	1.61838	0.926942	-3.48396	6.08396
		800mg/kgBW	4					200mg/KgBW Extract AA	-0.475	1.8094	0.998874	-5.82363	4.87363
			5.2					800mg/KgBW Extract AA	1.36667	1.61838	0.913749	-3.41729	6.15063
			2.6				200mg/KgBW Extract AA	Corn oil (5mg/KgBW)	-8.22500*	1.8094	0.00123833	-13.5736	-2.87637
			3.4					Estradiol (1mg/KgBW)	1.775	1.8094	0.861033	-3.57363	7.12363
			3.1					50mg/KgBW Extract AA	0.475	1.8094	0.998874	-4.87363	5.82363
			3.8					800mg/KgBW Extract AA	1.84167	1.8094	0.844558	-3.50696	7.1903
		MEAN	3.68333				800mg/KgBW Extract AA	Corn oil (5mg/KgBW)	-10.06667*	1.61838	2.19767e-05	-14.8506	-5.28271
		SEM	0.817347					Estradiol (1mg/KgBW)	-0.0666667	1.61838	0.999999	-4.85063	4.71729
								50mg/KgBW Extract AA	-1.36667	1.61838	0.913749	-6.15063	3.41729
								200mg/KgBW Extract AA	-1.84167	1.8094	0.844558	-7.1903	3.50696
						Bonferroni	Corn oil (5mg/KgBW)	Estradiol (1mg/KgBW)	10.00000*	1.61838	2.64623e-05	4.97656	15.0234
								50mg/KgBW Extract AA	8.70000*	1.61838	0.000184554	3.67656	13.7234
								200mg/KgBW Extract AA	8.22500*	1.8094	0.00144431	2.60863	13.8414
								800mg/KgBW Extract AA	10.06667*	1.61838	2.39965e-05	5.04323	15.0901
							Estradiol (1mg/KgBW)	Corn oil (5mg/KgBW)	-10.00000*	1.61838	2.64623e-05	-15.0234	-4.97656
								50mg/KgBW Extract AA	-1.3	1.61838	1	-6.32344	3.72344
								200mg/KgBW Extract AA	-1.775	1.8094	1	-7.39137	3.84137
								800mg/KgBW Extract AA	0.0666667	1.61838	1	-4.95677	5.0901
							50mg/KgBW Extract AA	Corn oil (5mg/KgBW)	-8.70000*	1.61838	0.000184554	-13.7234	-3.67656
								Estradiol (1mg/KgBW)	1.3	1.61838	1	-3.72344	6.32344
								200mg/KgBW Extract AA	-0.475	1.8094	1	-6.09137	5.14137
								800mg/KgBW Extract AA	1.36667	1.61838	1	-3.65677	6.3901
							200mg/KgBW Extract AA	Corn oil (5mg/KgBW)	-8.22500*	1.8094	0.00144431	-13.8414	-2.60863
								Estradiol (1mg/KgBW)	1.775	1.8094	1	-3.84137	7.39137
								50mg/KgBW Extract AA	0.475	1.8094	1	-5.14137	6.09137
								800mg/KgBW Extract AA	1.84167	1.8094	1	-3.77471	7.45804
							800mg/KgBW Extract AA	Corn oil (5mg/KgBW)	-10.06667*	1.61838	2.39965e-05	-15.0901	-5.04323
								Estradiol (1mg/KgBW)	-0.0666667	1.61838	1	-5.0901	4.95677
								50mg/KgBW Extract AA	-1.36667	1.61838	1	-6.3901	3.65677
								200mg/KgBW Extract AA	-1.84167	1.8094	1	-7.45804	3.77471
						*. The mean difference is significant at the 0.05 level.

## Sheet: Prg WA
			Dose	Progesterone (nmol/L)
			Control Corn Oil 5.0 ml/kgBW(-ve)	21.2
				19
				20					Control	EE	50 AA	200 AA	800 AA		Dose	Progesterone (nmol/L)	SD	SEM	PV
				19					21.2	5	19.6	17.3			Control 5.0ml/kgBW	19.2333	1.98158	0.808977
				20.6					19	4	19	7.2	35.3		1mg/kgBW(EE)	6.65	1.96647	0.802808	0.0261684
				15.6					20	6.1	23.2	41.7	33.3		50mg/kgBW	21.8167	3.76426	1.53675	0.961993
			MEAN	19.2333					19	8.9	28.9	15.6	32.5		200mg/kgBW	19.6333	11.6325	4.74894	0.999973
			SEM	1.80893					20.6	8.6	20	16	50.7		800mg/kgBW	39.936	8.65728	3.87165	0.000299993
									15.6	7.3	20.2	20	47.88
								mean	19.2333	6.65	21.8167	19.6333	39.936
			1mg/kgBW(+ve) 17α-ethinylestradiol	5				SD	1.98158	1.96647	3.76426	11.6325	8.65728
				4
				6.1
				8.9
				8.6			Descriptives
				7.3			Progesterone
			MEAN	6.65				N	Mean	Std. Deviation	Std. Error	95% Confidence Interval for Mean		Minimum	Maximum
			SEM	1.79513								Lower Bound	Upper Bound
			M+SEM				Corn oil (5mg/KgBW)	6	19.2333	1.98158	0.808977	17.1538	21.3129	15.6	21.2
							Estradiol (1mg/KgBW)	6	6.65	1.96647	0.802808	4.58632	8.71368	4	8.9
			50mg/kgBW	19.6			50mg/KgBW Extract AA	6	21.8167	3.76426	1.53675	17.8663	25.767	19	28.9
				19			200mg/KgBW Extract AA	6	19.6333	11.6325	4.74894	7.42579	31.8409	7.2	41.7
				23.2			800mg/KgBW Extract AA	5	39.936	8.65728	3.87165	29.1866	50.6854	32.5	50.7
				28.9			Total	29	20.8166	12.1707	2.26005	16.1871	25.446	4	50.7
				20
				20.2
			MEAN	21.8167
			SEM	3.43629			Multiple Comparisons
			M+SEM				Dependent Variable:	Progesterone
							(I) Treatment			Mean Difference (I-J)	Std. Error	Sig.	95% Confidence Interval
			200mg/kgBW	17.3									Lower Bound	Upper Bound
				7.2			Tukey HSD	Corn oil (5mg/KgBW)	Estradiol (1mg/KgBW)	12.58333*	3.88406	0.0261684	1.14079	24.0259
				41.7					50mg/KgBW Extract AA	-2.58333	3.88406	0.961993	-14.0259	8.85921
				15.6					200mg/KgBW Extract AA	-0.4	3.88406	0.999973	-11.8425	11.0425
				16					800mg/KgBW Extract AA	-20.70267*	4.07363	0.000299993	-32.7037	-8.70163
				20				Estradiol (1mg/KgBW)	Corn oil (5mg/KgBW)	-12.58333*	3.88406	0.0261684	-24.0259	-1.14079
			MEAN	19.6333					50mg/KgBW Extract AA	-15.16667*	3.88406	0.00549048	-26.6092	-3.72413
			SEM	10.619					200mg/KgBW Extract AA	-12.98333*	3.88406	0.0207031	-24.4259	-1.54079
			M+SEM						800mg/KgBW Extract AA	-33.28600*	4.07363	2.05231e-07	-45.287	-21.285
								50mg/KgBW Extract AA	Corn oil (5mg/KgBW)	2.58333	3.88406	0.961993	-8.85921	14.0259
			800mg/kgBW	87.6					Estradiol (1mg/KgBW)	15.16667*	3.88406	0.00549048	3.72413	26.6092
				35.3					200mg/KgBW Extract AA	2.18333	3.88406	0.979295	-9.25921	13.6259
				33.3					800mg/KgBW Extract AA	-18.11933*	4.07363	0.00145029	-30.1204	-6.1183
				32.5				200mg/KgBW Extract AA	Corn oil (5mg/KgBW)	0.4	3.88406	0.999973	-11.0425	11.8425
				50.7					Estradiol (1mg/KgBW)	12.98333*	3.88406	0.0207031	1.54079	24.4259
				47.88					50mg/KgBW Extract AA	-2.18333	3.88406	0.979295	-13.6259	9.25921
			MEAN	47.88					800mg/KgBW Extract AA	-20.30267*	4.07363	0.00038296	-32.3037	-8.30163
			SEM	20.9428				800mg/KgBW Extract AA	Corn oil (5mg/KgBW)	20.70267*	4.07363	0.000299993	8.70163	32.7037
									Estradiol (1mg/KgBW)	33.28600*	4.07363	2.05231e-07	21.285	45.287
									50mg/KgBW Extract AA	18.11933*	4.07363	0.00145029	6.1183	30.1204
									200mg/KgBW Extract AA	20.30267*	4.07363	0.00038296	8.30163	32.3037
							Bonferroni	Corn oil (5mg/KgBW)	Estradiol (1mg/KgBW)	12.58333*	3.88406	0.0348784	0.579607	24.5871
									50mg/KgBW Extract AA	-2.58333	3.88406	1	-14.5871	9.42039
									200mg/KgBW Extract AA	-0.4	3.88406	1	-12.4037	11.6037
									800mg/KgBW Extract AA	-20.70267*	4.07363	0.000337641	-33.2923	-8.11305
								Estradiol (1mg/KgBW)	Corn oil (5mg/KgBW)	-12.58333*	3.88406	0.0348784	-24.5871	-0.579607
									50mg/KgBW Extract AA	-15.16667*	3.88406	0.00669892	-27.1704	-3.16294
									200mg/KgBW Extract AA	-12.98333*	3.88406	0.0271323	-24.9871	-0.979607
									800mg/KgBW Extract AA	-33.28600*	4.07363	2.16565e-07	-45.8756	-20.6964
								50mg/KgBW Extract AA	Corn oil (5mg/KgBW)	2.58333	3.88406	1	-9.42039	14.5871
									Estradiol (1mg/KgBW)	15.16667*	3.88406	0.00669892	3.16294	27.1704
									200mg/KgBW Extract AA	2.18333	3.88406	1	-9.82039	14.1871
									800mg/KgBW Extract AA	-18.11933*	4.07363	0.00169077	-30.7089	-5.52972
								200mg/KgBW Extract AA	Corn oil (5mg/KgBW)	0.4	3.88406	1	-11.6037	12.4037
									Estradiol (1mg/KgBW)	12.98333*	3.88406	0.0271323	0.979607	24.9871
									50mg/KgBW Extract AA	-2.18333	3.88406	1	-14.1871	9.82039
									800mg/KgBW Extract AA	-20.30267*	4.07363	0.000432974	-32.8923	-7.71305
								800mg/KgBW Extract AA	Corn oil (5mg/KgBW)	20.70267*	4.07363	0.000337641	8.11305	33.2923
									Estradiol (1mg/KgBW)	33.28600*	4.07363	2.16565e-07	20.6964	45.8756
									50mg/KgBW Extract AA	18.11933*	4.07363	0.00169077	5.52972	30.7089
									200mg/KgBW Extract AA	20.30267*	4.07363	0.000432974	7.71305	32.8923
							*. The mean difference is significant at the 0.05 level.

## Sheet: Prg Combined
		WO							WA
		Dose	Progesterone WO	SD	SEM	PV			Dose	Progesterone WA	SD	SEM	PV
		Control 5.0ml/kgBW	13.75	4.93184	2.01341				Control 5.0ml/kgBW	19.2333	1.98158	0.808977
		1mg/kgBW(EE)	3.75	1.16576	0.47592	2.42116e-05			1mg/kgBW(EE)	6.65	1.96647	0.802808	0.0261684
		50mg/kgBW	5.05	2.24299	0.915696	0.000164858			50mg/kgBW	21.8167	3.76426	1.53675	0.961993
		200mg/kgBW	5.525	2.77774	1.38887	0.00123833			200mg/kgBW	19.6333	11.6325	4.74894	0.999973
		800mg/kgBW	3.68333	0.895358	0.365529	2.19767e-05			800mg/kgBW	39.936	8.65728	3.87165	0.000299993

## Sheet: LH WO
LH WO
							WO						WO
	Dose	LH (IU/L)					Control	LH (IU/L)	50 AA	200 AA	800 AA		Dose	LH (IU/L)	SD	SEM	PV
	Control Corn Oil 5.0 ml/kgBW(-ve)	0.3					0.3	0.1	0.1	0.1	0.1		Control 5.0ml/kgBW	0.15	0.083666	0.0341565
		0.1					0.1	0.1	0.2	0.2	0.1		1mg/kgBW(EE)	0.133333	0.0516398	0.0210819	0.981496
		0.2					0.2	0.2	0.1	0.1	0.1		50mg/kgBW	0.116667	0.0408248	0.0166667	0.80939
		0.1					0.1	0.1	0.1	0.1	0.1		200mg/kgBW	0.133333	0.0516398	0.0210819	0.981496
		0.1					0.1	0.2	0.1	0.1	0.1		800mg/kgBW	0.1	5.37484e-18	2.19427e-18	0.489144
		0.1					0.1	0.1	0.1	0.2	0.1
	MEAN	0.15				mean	0.15	0.133333	0.116667	0.133333	0.1
	SEM	0.0763763				SD	0.083666	0.0516398	0.0408248	0.0516398	1.52024e-17
						mean	0.15	0.133333	0.116667	0.133333	0.1
	1mg/kgBW(+ve) 17α-ethinylestradiol	0.1
		0.1
		0.2						Descriptives
		0.1						LH
		0.2							N	Mean	Std. Deviation	Std. Error	95% Confidence Interval for Mean		Minimum	Maximum
		0.1											Lower Bound	Upper Bound
	MEAN	0.133333						Corn oil (5mg/KgBW)	6	0.15	0.083666	0.0341565	0.0621979	0.237802	0.1	0.3
	SEM	0.0471405						Estradiol (1mg/KgBW)	6	0.133333	0.0516398	0.0210819	0.0791407	0.187526	0.1	0.2
	M+SEM							50mg/KgBW Extract AA	6	0.116667	0.0408248	0.0166667	0.0738236	0.15951	0.1	0.2
								200mg/KgBW Extract AA	6	0.133333	0.0516398	0.0210819	0.0791407	0.187526	0.1	0.2
	50mg/kgBW	0.1						800mg/KgBW Extract AA	6	0.1	5.37484e-18	2.19427e-18	0.1	0.1	0.1	0.1
		0.2						Total	30	0.126667	0.052083	0.00950902	0.107219	0.146115	0.1	0.3
		0.1
		0.1
		0.1						Multiple Comparisons
		0.1						Dependent Variable:	LH
	MEAN	0.116667						(I) Treatment			Mean Difference (I-J)	Std. Error	Sig.	95% Confidence Interval
	SEM	0.0372678												Lower Bound	Upper Bound
	M+SEM							Tukey HSD	Corn oil (5mg/KgBW)	Estradiol (1mg/KgBW)	0.0166667	0.0305505	0.981496	-0.0730562	0.10639
										50mg/KgBW Extract AA	0.0333333	0.0305505	0.80939	-0.0563896	0.123056
	200mg/kgBW	0.1								200mg/KgBW Extract AA	0.0166667	0.0305505	0.981496	-0.0730562	0.10639
		0.2								800mg/KgBW Extract AA	0.05	0.0305505	0.489144	-0.0397229	0.139723
		0.1							Estradiol (1mg/KgBW)	Corn oil (5mg/KgBW)	-0.0166667	0.0305505	0.981496	-0.10639	0.0730562
		0.1								50mg/KgBW Extract AA	0.0166667	0.0305505	0.981496	-0.0730562	0.10639
		0.1								200mg/KgBW Extract AA	0	0.0305505	1	-0.0897229	0.0897229
		0.2								800mg/KgBW Extract AA	0.0333333	0.0305505	0.80939	-0.0563896	0.123056
	MEAN	0.133333							50mg/KgBW Extract AA	Corn oil (5mg/KgBW)	-0.0333333	0.0305505	0.80939	-0.123056	0.0563896
	SEM	0.0471405								Estradiol (1mg/KgBW)	-0.0166667	0.0305505	0.981496	-0.10639	0.0730562
	M+SEM									200mg/KgBW Extract AA	-0.0166667	0.0305505	0.981496	-0.10639	0.0730562
										800mg/KgBW Extract AA	0.0166667	0.0305505	0.981496	-0.0730562	0.10639
	800mg/kgBW	0.1							200mg/KgBW Extract AA	Corn oil (5mg/KgBW)	-0.0166667	0.0305505	0.981496	-0.10639	0.0730562
		0.1								Estradiol (1mg/KgBW)	0	0.0305505	1	-0.0897229	0.0897229
		0.1								50mg/KgBW Extract AA	0.0166667	0.0305505	0.981496	-0.0730562	0.10639
		0.1								800mg/KgBW Extract AA	0.0333333	0.0305505	0.80939	-0.0563896	0.123056
		0.1							800mg/KgBW Extract AA	Corn oil (5mg/KgBW)	-0.05	0.0305505	0.489144	-0.139723	0.0397229
		0.1								Estradiol (1mg/KgBW)	-0.0333333	0.0305505	0.80939	-0.123056	0.0563896
	MEAN	0.1								50mg/KgBW Extract AA	-0.0166667	0.0305505	0.981496	-0.10639	0.0730562
	SEM	0								200mg/KgBW Extract AA	-0.0333333	0.0305505	0.80939	-0.123056	0.0563896
								Bonferroni	Corn oil (5mg/KgBW)	Estradiol (1mg/KgBW)	0.0166667	0.0305505	1	-0.0773739	0.110707
										50mg/KgBW Extract AA	0.0333333	0.0305505	1	-0.0607072	0.127374
										200mg/KgBW Extract AA	0.0166667	0.0305505	1	-0.0773739	0.110707
										800mg/KgBW Extract AA	0.05	0.0305505	1	-0.0440405	0.144041
									Estradiol (1mg/KgBW)	Corn oil (5mg/KgBW)	-0.0166667	0.0305505	1	-0.110707	0.0773739
										50mg/KgBW Extract AA	0.0166667	0.0305505	1	-0.0773739	0.110707
										200mg/KgBW Extract AA	0	0.0305505	1	-0.0940405	0.0940405
										800mg/KgBW Extract AA	0.0333333	0.0305505	1	-0.0607072	0.127374
									50mg/KgBW Extract AA	Corn oil (5mg/KgBW)	-0.0333333	0.0305505	1	-0.127374	0.0607072
										Estradiol (1mg/KgBW)	-0.0166667	0.0305505	1	-0.110707	0.0773739
										200mg/KgBW Extract AA	-0.0166667	0.0305505	1	-0.110707	0.0773739
										800mg/KgBW Extract AA	0.0166667	0.0305505	1	-0.0773739	0.110707
									200mg/KgBW Extract AA	Corn oil (5mg/KgBW)	-0.0166667	0.0305505	1	-0.110707	0.0773739
										Estradiol (1mg/KgBW)	0	0.0305505	1	-0.0940405	0.0940405
										50mg/KgBW Extract AA	0.0166667	0.0305505	1	-0.0773739	0.110707
										800mg/KgBW Extract AA	0.0333333	0.0305505	1	-0.0607072	0.127374
									800mg/KgBW Extract AA	Corn oil (5mg/KgBW)	-0.05	0.0305505	1	-0.144041	0.0440405
										Estradiol (1mg/KgBW)	-0.0333333	0.0305505	1	-0.127374	0.0607072
										50mg/KgBW Extract AA	-0.0166667	0.0305505	1	-0.110707	0.0773739
										200mg/KgBW Extract AA	-0.0333333	0.0305505	1	-0.127374	0.0607072

[truncated: 2 more sheets: LH WA, LH Combined]
